# Supplementary material for: Highly efficient solid-state red fluorophores using ESIPT: crystal packing and fluorescence properties of alkoxy-substituted dibenzothiazolylphenols
Source: Royal Society of Chemistry journal article supplement (doi:10.1039/c3ce42109k), 2014-01-01
Supplement: c3ce42109k.pdf [file c3ce42109k.pdf]

## Supporting Information

# Highly efficient solid-state red fluorophores using ESIPT: crystal packing and fluorescence properties of alkoxy- substituted dibenzothiazolylphenols

Ken-ichi Sakai,<sup>\*,†</sup> Hiroshi Kawamura,<sup>†</sup> Noriyuki Kobayashi,<sup>†</sup> Takaaki Ishikawa,<sup>†</sup> Chiori Ikeda,<sup>†</sup>  
Takemitsu Kikuchi<sup>‡</sup> and Tomoyuki Akutagawa<sup>‡</sup>

<sup>†</sup>Department of Bio- and Material Photonics, Chitose Institute of Science and Technology (CIST), Chitose 066-8655, Japan, <sup>‡</sup> Polymer Hybrid Materials Research Center, Institute of Multidisciplinary Research for Advanced Materials (IMRAM), Tohoku University, Sendai 980-8577, Japan

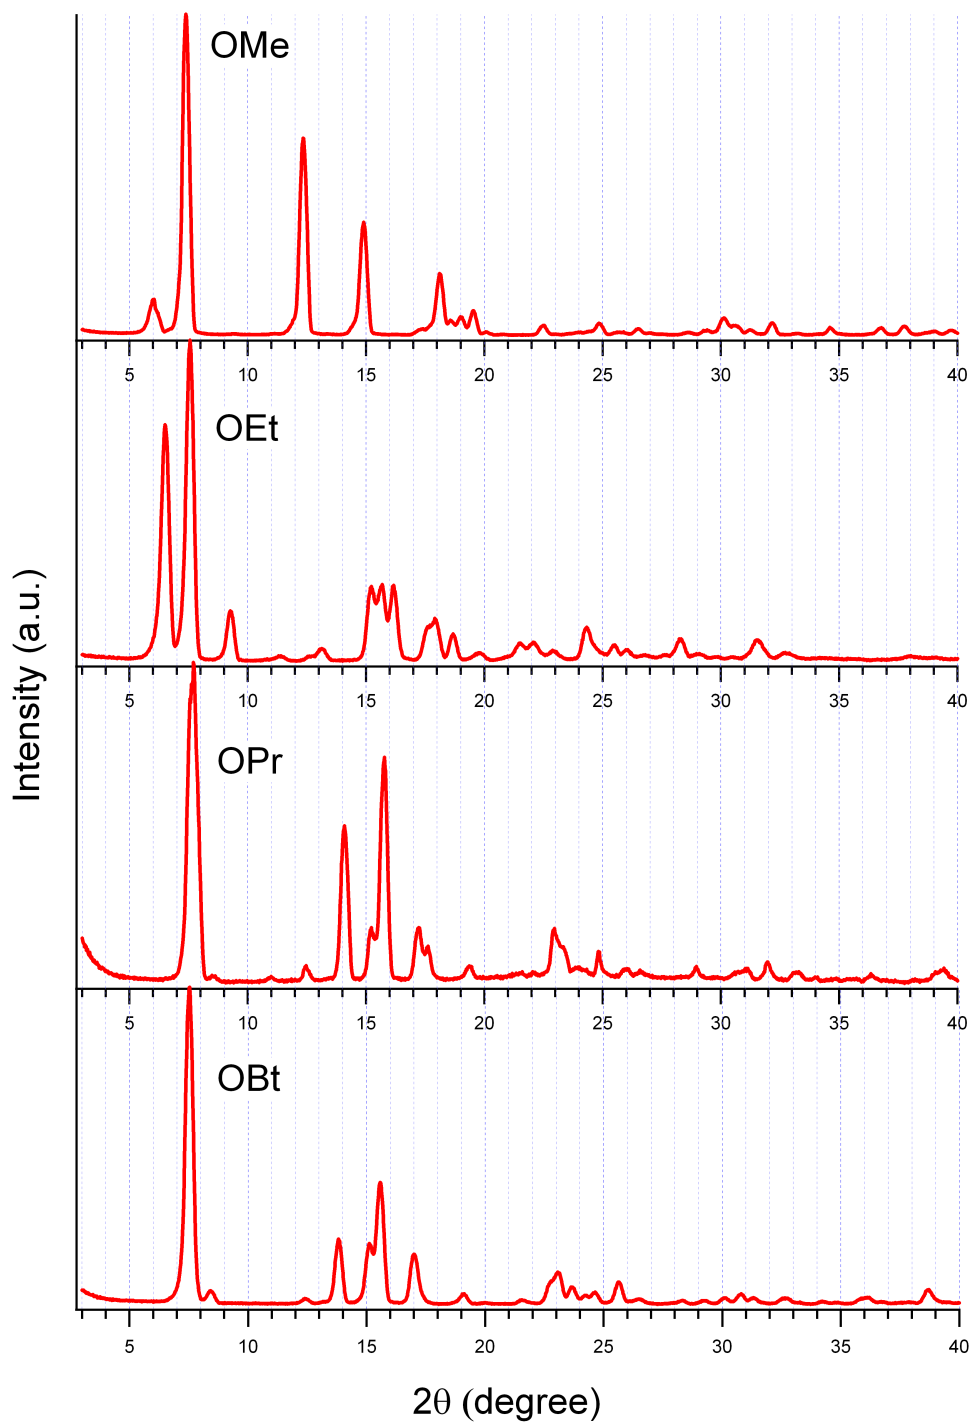

**Figure S1.** Powder XRD patterns of OMe, OEt, OPr, and OBt. The measurements were performed using a Rigaku X-ray diffractometer RINT-ultimaIII/SW.
